# Supplementary material for: One-step synthesis of PY-NBD to distinguish Cys/Hcy and GSH in aqueous solutions and living cells by dual channels
Source: Royal Society of Chemistry journal article supplement (doi:10.1039/d1nj06165h), 2022-01-01
Supplement: d1nj06165h1.pdf [file d1nj06165h1.pdf]

## Supplementary information

### One Step Synthesis of PY-NBD to Distinguish Cys/Hcy and GSH in Aqueous Solution and Living Cells by Dual Channels

Mengxu Gao, Sa Su, Hao Kang, Chenlu Liang, Rubing Han, Jing Jing\*, and Xiaoling Zhang\*

Key Laboratory of Medical Molecule Science and Pharmaceutics Engineering, Ministry of Industry and Information Technology, Key Laboratory of Cluster Science of Ministry of Education, Beijing Key Laboratory of Photo-electronic/Electro photonic Conversion Materials, Analytical and Testing Center, School of Chemistry and Chemical Engineering, Beijing Institute of Technology, Beijing 100081, P. R. China.

*E-mail address:* hellojane@bit.edu.cn (J. Jing), zhangxl@bit.edu.cn (X.L. Zhang)

## CONTENTS

|                                                                                         |    |
|-----------------------------------------------------------------------------------------|----|
| 1. Experimental reagents and instruments .....                                          | S2 |
| 2. Characterization data .....                                                          | S2 |
| 3. Time-dependent fluorescence changes of <b>PY-NBD</b> .....                           | S3 |
| 4. The capabilities of <b>PY-NBD</b> for detecting Hcy/Cys and GSH at different pH..... | S4 |
| 5. ESI-MS of <b>PY-NBD</b> after upon addition Cys, Hcy, and GSH .....                  | S4 |
| 6. Cytotoxicity assay .....                                                             | S5 |

## 1. Experimental reagents and instruments

All other chemicals were obtained from commercial suppliers and used without further purification. Silica gel (200-300 mesh, Qingdao Haiyang Chemical Co.) was used for column chromatography.  $^1\text{H}$  NMR and  $^{13}\text{C}$  NMR spectra were recorded on a Bruker Advance at 400MHz or at 100 MHz,  $\delta$  values are in parts per million relatives to TMS in  $\text{DMSO-d}_6$ . Mass spectra (MS) were measured with Bruker Apex IV FTMS using electrospray ionization (ESI). Absorption spectra were recorded on a Purkinje TU-1901 spectrophotometer. Fluorescence measurements were taken on a Hitachi F-7000 fluorescence spectrometer with a 10mm quartz cuvette. pH measurements were carried out with a pH acidometer (Mettler Toledo FE-30). Fluorescence imaging was observed under an Olympus IX81 confocal fluorescence microscope.

## 2. Characterization data

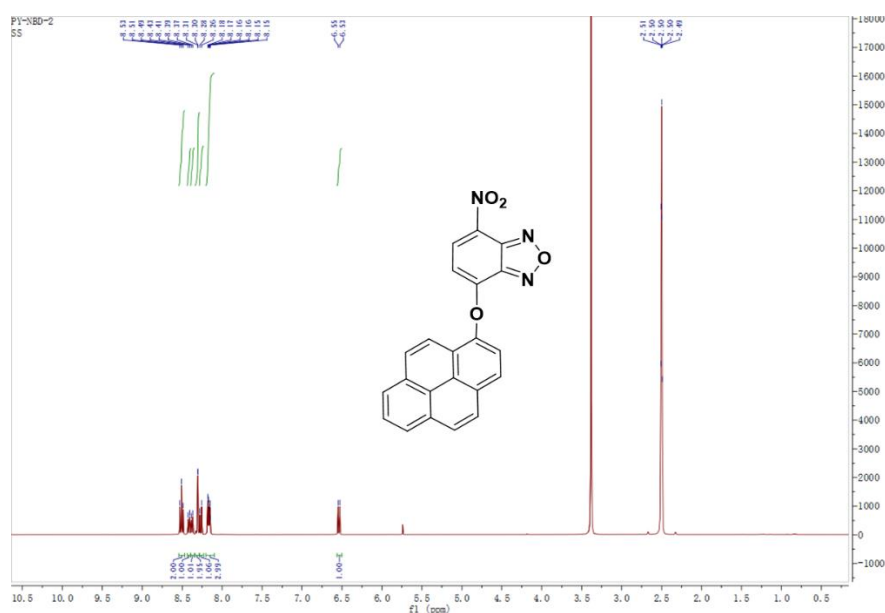

**Fig. S1.**  $^1\text{H}$  NMR (400 MHz,  $\text{DMSO-d}_6$ ) spectra of probe **PY-NBD**.

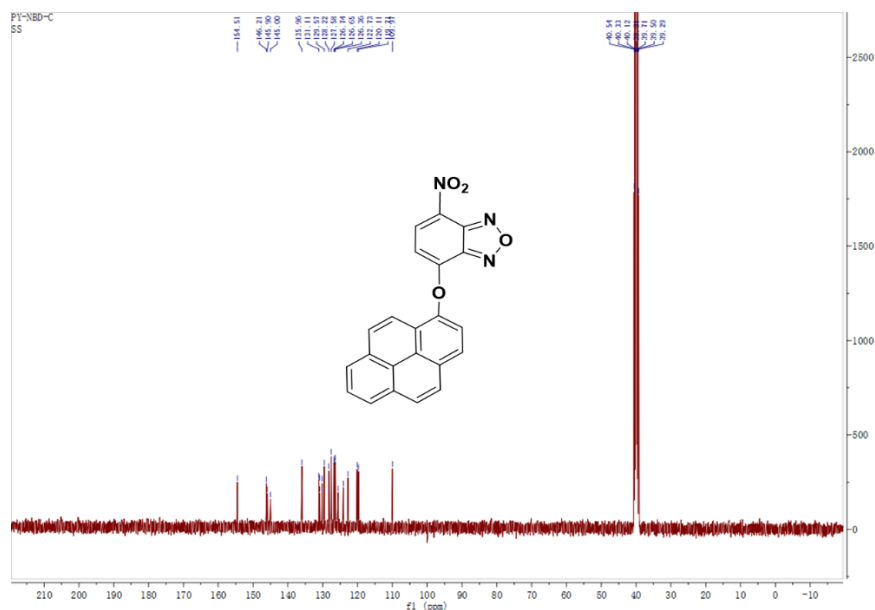

Fig. S2.  $^{13}\text{C}$  NMR (101 MHz,  $\text{DMSO-d}_6$ ) spectra of probe PY-NBD.

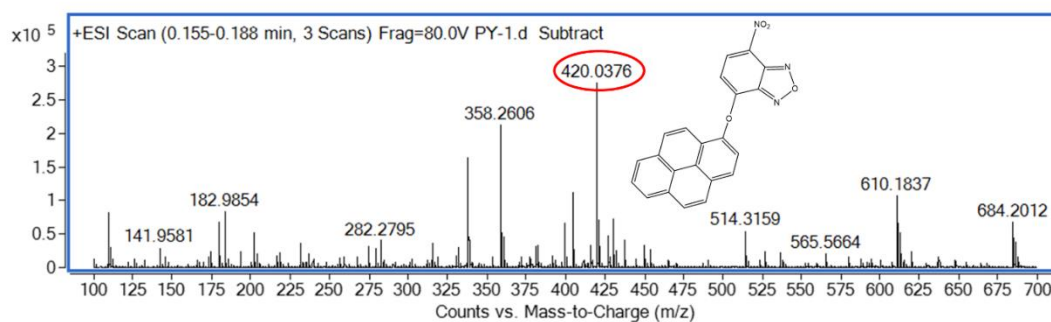

Fig. S3. ESI-MS of probe PY-NBD.

### 3. Time-dependent fluorescence changes of PY-NBD

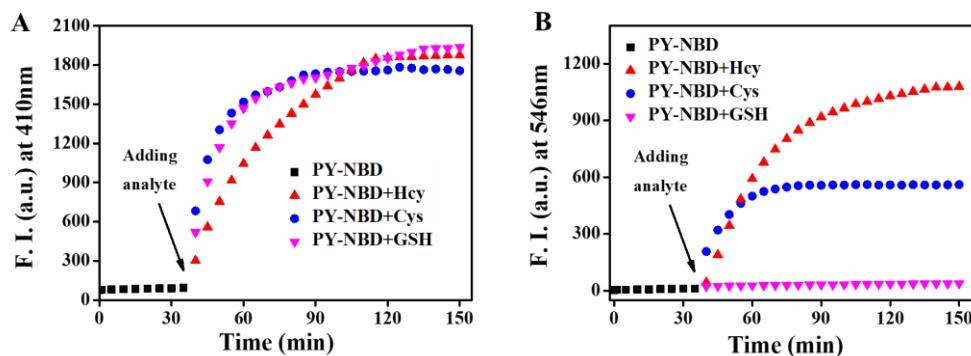

Fig. S4. The stability of PY-NBD ( $5\ \mu\text{M}$ ) in PBS ( $10\ \text{mM}$ ,  $\text{pH}\ 7.4$ ,  $50\% \text{CH}_3\text{CN}$ ,  $\text{V/V}$ ) system and the fluorescence spectrum of response time to  $50\ \mu\text{M}$  Hcy/Cys/GSH. (A) At  $410\ \text{nm}$ ,  $\lambda_{\text{ex}}=345\ \text{nm}$ . Slit:  $2.5\ \text{nm}/2.5\ \text{nm}$ ; (B) At  $546\ \text{nm}$ ,  $\lambda_{\text{ex}}=473\ \text{nm}$ . Slit:  $5.0\ \text{nm}/5.0\ \text{nm}$ .

#### 4. The capabilities of PY-NBD for detecting Hcy/Cys and GSH at different pH

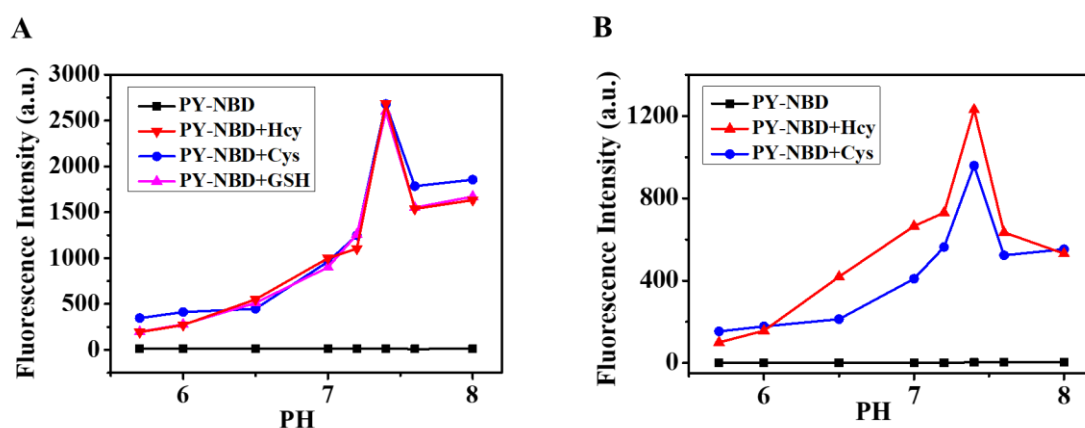

Fig. S5. Fluorescence intensity change graph of PY-NBD (5  $\mu$ M) and Hcy/Cys/GSH (50  $\mu$ M) at different pH. (A) At 410nm,  $\lambda_{ex}$ =345 nm. Slit: 2.5 nm/2.5 nm; (B) At 546nm,  $\lambda_{ex}$ =473 nm. Slit: 5.0 nm/5.0 nm.

#### 5. ESI-MS of PY-NBD after upon addition Cys, Hcy, and GSH

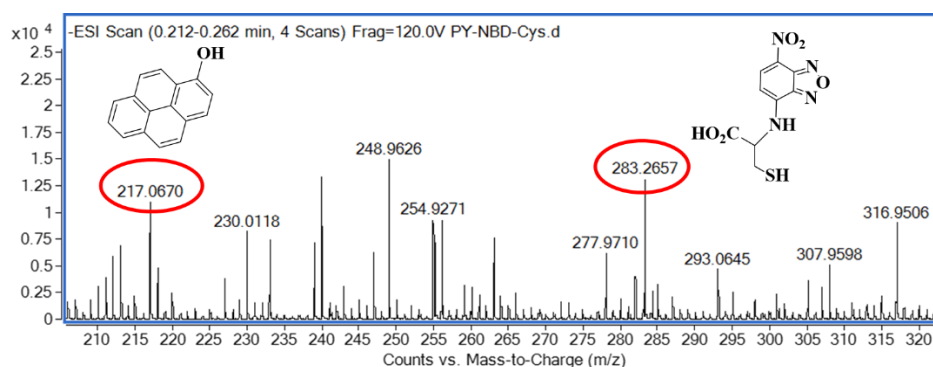

Fig. S6. ESI-MS of PY-NBD after upon addition Cys.

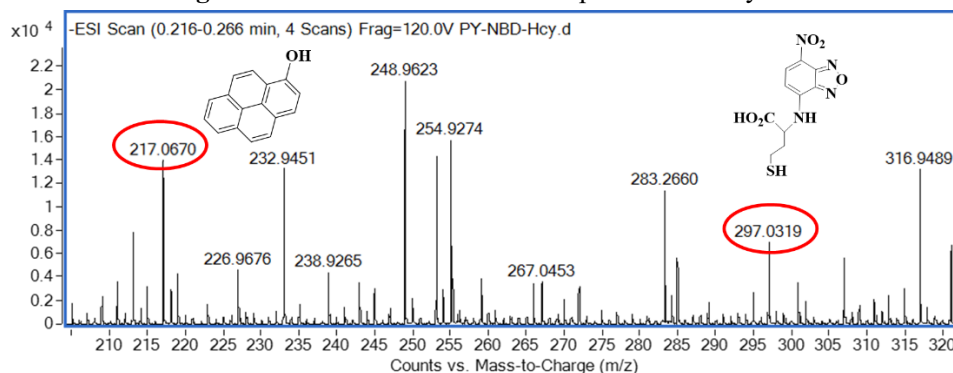

Fig. S7. ESI-MS of PY-NBD after upon addition Hcy

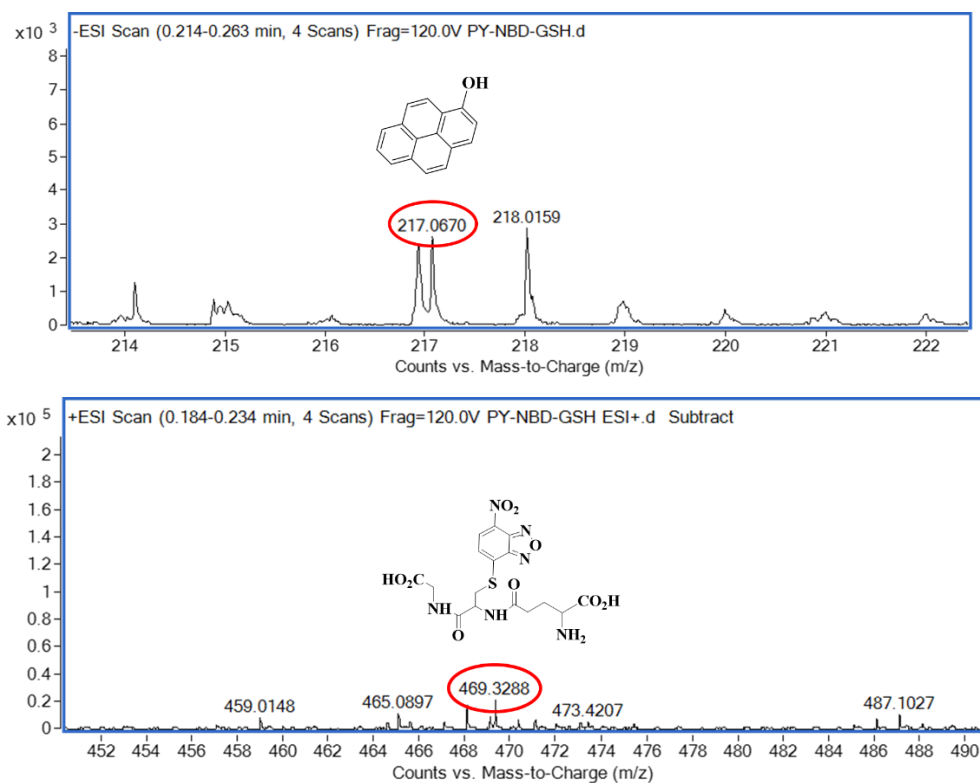

**Fig. S8.** ESI-MS of PY-NBD after upon addition GSH

## 6. Cytotoxicity assay

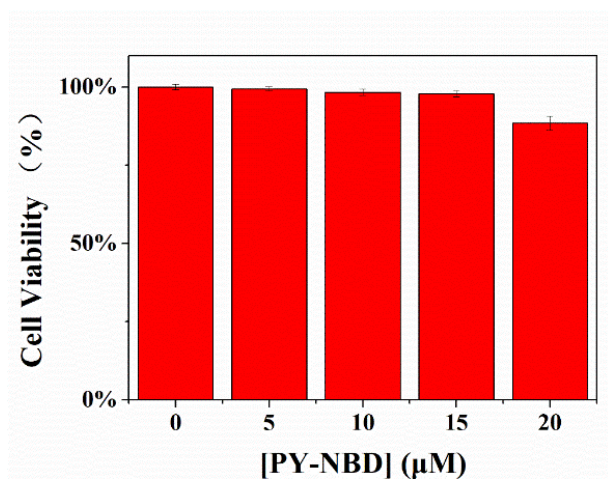

**Fig. S9.** Cell viability of HeLa cells treated with different concentrations of PY-NBD
